# Supplementary material for: Circulating NET biomarkers as predictors of inflammatory storm escalation and critical illness in COVID-19
Source: Research Square preprint supplement (doi:10.21203/rs.3.rs-7475642/v1), 2025-09-30
Supplement: Supplementary file 1 [file 4d1e9ad878e03d89c34391b4.docx]

***Circulating NET biomarkers as predictors of inflammatory storm escalation and critical illness in COVID-19***

Supplementary Table 1

Relationship between biomarkers of NETs and clinical clinical parameter during acute COVID-19

| **r** | **cfDNA** | **Histone-DNA** | **MPO-DNA** | **NE-DNA** | **CitH3** |
| --- | --- | --- | --- | --- | --- |
| **WBC** | 0.110444094 | 0.211612428 | -0.014904316 | -0.204971728 | 0.187212421 |
| **Neu(#)** | 0.083048865 | 0.217861469 | 0.005498048 | -0.184707674 | 0.218052136 |
| **Neu(%)** | -0.063673842 | 0.162564036 | 0.04155376 | -0.056750402 | 0.17985361 |
| **Lym(#)** | 0.073599417 | -0.018165783 | -0.133231692 | -0.133046283 | -0.183412424 |
| **Lym(%)** | -0.022084342 | -0.173513645 | -0.047881764 | 0.030153184 | -0.236451621 |
| **CRP** | 0.071204511 | 0.179479953 | 0.103766684 | 0.287015759 | 0.22100373 |
| **PCT** | -0.144213481 | 0.440726062 | 0.204077778 | 0.155308751 | 0.318425326 |
| **IL-6** | 0.176695726 | -0.001740591 | 0.091864077 | 0.143014032 | 0.270458263 |

Supplementary Table 2

Relationship between biomarkers of NETs and clinical clinical parameter during acute COVID-19

| **p** | **cfDNA** | **Histone-DNA** | **MPO-DNA** | **NE-DNA** | **CitH3** |
| --- | --- | --- | --- | --- | --- |
| **WBC** | 0.276470717 | 0.035496296 | 0.883589213 | 0.041830311 | 0.063521368 |
| **Neu(#)** | 0.413788802 | 0.030291633 | 0.956926782 | 0.06721111 | 0.030143566 |
| **Neu(%)** | 0.531225482 | 0.107909067 | 0.682994571 | 0.576886704 | 0.07485536 |
| **Lym(#)** | 0.469073566 | 0.858356676 | 0.188620116 | 0.189241541 | 0.069186185 |
| **Lym(%)** | 0.828230031 | 0.085875646 | 0.637899963 | 0.76701821 | 0.018457921 |
| **CRP** | 0.483697614 | 0.075471655 | 0.306726349 | 0.003972147 | 0.027928409 |
| **PCT** | 0.154406334 | 4.98459E-06 | 0.042750841 | 0.124782092 | 0.001317702 |
| **IL-6** | 0.080193216 | 0.986357856 | 0.365814222 | 0.157899916 | 0.006779125 |
